# Supplementary material for: A phase 2 study of momelotinib, a potent JAK1 and JAK2 inhibitor, in patients with polycythemia vera or essential thrombocythemia
Source: PubMed Central journal article supplement — Leuk Res. Author manuscript; Available in PMC 2021 Jun 2. (PMC8170698; doi:10.1016/j.leukres.2017.05.002), 2017-05-30
Supplement: NIHMS1698100-supplement-Supplementary_Tables_1698100.pdf [file NIHMS1698100-supplement-Supplementary_Tables_1698100.pdf]

**Supplementary Table 1.** Plasma biomarkers at week 4

| <b>Biomarker</b> | <b>PV Cohort<br/>(N = 28)<br/>Median % of BL<br/>min, max<br/>p-value<sup>a</sup></b> | <b>ET Cohort<br/>(N = 11)<br/>Median % of BL<br/>min, max</b> |
|------------------|---------------------------------------------------------------------------------------|---------------------------------------------------------------|
|                  | 88.2                                                                                  | 92.3                                                          |
| B2M              | 62.5, 123.8<br>p < 0.005                                                              | 73.3, 136.8                                                   |
|                  | 48.3                                                                                  | 53.8                                                          |
| CRP              | 6.5, 1783.8<br>p = 0.070                                                              | 3.4, 500.0                                                    |
|                  | 90.9                                                                                  | 86.1                                                          |
| Ferritin         | 43.4, 231.6                                                                           | 41.0, 149.0                                                   |
|                  | 86.5                                                                                  | 104.2                                                         |
| Haptoglobin      | 14.8, 233.3                                                                           | 21.4, 181.8                                                   |
|                  | 100.0                                                                                 | 109.0                                                         |
| ICAM-1           | 66.4, 153.3                                                                           | 63.0, 151.6                                                   |
|                  | 100.0                                                                                 | 100.0                                                         |
| IL-12p40         | 70.8, 170.2                                                                           | 68.8, 134.0                                                   |
|                  | 80.8                                                                                  | 94.8                                                          |
| IL-1ra           | 44.5, 150.8<br>p = 0.095                                                              | 74.6, 151.6                                                   |
|                  | 97.0                                                                                  | 93.3                                                          |
| IL-6r            | 75.0, 113.6                                                                           | 44.8, 105.9                                                   |
|                  | 117.2                                                                                 | 145.1                                                         |
| MCP-1            | 49.5, 315.7<br>p = 0.024                                                              | 92.7, 191.4                                                   |
|                  | 93.3                                                                                  | 135.5                                                         |
| MIP-1-beta       | 41.9, 282.4                                                                           | 27.4, 188.1                                                   |
|                  | 47.8                                                                                  | 81.4                                                          |
| MPO              | 7.3, 158.8<br>p < 0.005                                                               | 31.0, 277.1                                                   |
|                  | 116.7                                                                                 | 100.0                                                         |
| RANTES           | 24.6, 361.4                                                                           | 66.7, 282.6                                                   |
|                  | 92.2                                                                                  | 89.3                                                          |
| TNFR2            | 48.2, 141.0<br>p = 0.055                                                              | 53.3, 163.0                                                   |
|                  | 92.7                                                                                  | 90.1                                                          |
| VCAM-1           | 54.5, 147.4                                                                           | 74.3, 117.2                                                   |
|                  | 100.0                                                                                 | 122.4                                                         |
| VEGF             | 36.9, 390.4                                                                           | 42.5, 164.8                                                   |

B2M, Beta-2-microglobulin; BL, baseline; CRP, C-reactive protein; ET, essential thrombocythemia; ICAM-1, Intercellular Adhesion Molecule 1; IL-12p40, Interleukin 12 subunit p40; IL-1ra, Interleukin 1 receptor antagonist; IL-6r, Interleukin 6 receptor; MCP-1, Monocyte Chemotactic Protein 1; MIP-1-beta, Macrophage Inflammatory Protein-1 beta; MPO, myeloperoxidase; PV, polycythemia vera; RANTES, T-cell-specific protein RANTES; TNFR2, Tumor Necrosis Factor Receptor 2; VCAM-1, Vascular Cell Adhesion Molecule-1; VEGF, Vascular Endothelial Growth Factor

<sup>a</sup>Nominal p-value reported (Wilcoxon mixed-rank test) for  $p < 0.1$  (not reported for ET cohort due to small number of patients). No multiple testing was performed. Relevant inflammatory biomarkers were evaluated and reported. No results reported for the following inflammatory markers due to  $>40\%$  of samples below LLOQ: EPO, GM-CSF, IFN-gamma, IL-10, IL-12p70, IL-13, IL-15, IL-17, IL-1-alpha, IL-2, IL-23, IL-3, IL-4, IL-5, IL-6, IL-7, IL-8, MIP-1-alpha, TNF-alpha, TNF-beta.

**Supplemental Table 2.** Momelotinib plasma concentration by time and dose

| Time (weeks) | 100 mg PV + ET |                |                        | 200 mg PV + ET         |    |                |                        |                        |
|--------------|----------------|----------------|------------------------|------------------------|----|----------------|------------------------|------------------------|
|              | n              | Median (ng/mL) | First quartile (ng/mL) | Third quartile (ng/mL) | n  | Median (ng/mL) | First quartile (ng/mL) | Third quartile (ng/mL) |
| 2            | 11             | 26.8           | 4.82                   | 98.4                   | 12 | 30.5           | 18.6                   | 44.6                   |
| 4            | 15             | 16.4           | 4.19                   | 155                    | 15 | 24.3           | 12.8                   | 57.7                   |
| 8            | 12             | 19.4           | 5.94                   | 41.9                   | 11 | 39.5           | 19.4                   | 82.0                   |
| 12           | 9              | 12.1           | 3.19                   | 14.6                   | 10 | 22.4           | 15.2                   | 144                    |
| 16           | 9              | 22.4           | 11.5                   | 43.8                   | 11 | 51.3           | 22.6                   | 177                    |
| 20           | 7              | 24.1           | 14.4                   | 27.9                   | 9  | 36.1           | 25.2                   | 122                    |
| 24           | 8              | 14.4           | 3.88                   | 25.7                   | 7  | 44.3           | 19.4                   | 249                    |

ET, essential thrombocythemia; PV, polycythemia vera.

**Supplemental Table 3.** Adverse events by cohort and dose

|                                       | PV Cohort          |                    |                   | ET Cohort         |                   |                   |
|---------------------------------------|--------------------|--------------------|-------------------|-------------------|-------------------|-------------------|
|                                       | 100 mg<br>(N = 14) | 200 mg<br>(N = 14) | Total<br>(N = 28) | 100 mg<br>(N = 5) | 200 mg<br>(N = 6) | Total<br>(N = 11) |
| Patients with $\geq 1$ TEAE           | 12 (85.7)          | 14 (100.0)         | 26 (92.9)         | 5 (100.0)         | 5 (83.3)          | 10 (90.9)         |
| <b>Most frequent TEAE<sup>a</sup></b> |                    |                    |                   |                   |                   |                   |
| Headache                              | 5 (35.7)           | 4 (28.6)           | 9 (32.1)          | 1 (20.0)          | 3 (50.0)          | 4 (36.4)          |
| Dizziness                             | 0                  | 6 (42.9)           | 6 (21.4)          | 0                 | 3 (50.0)          | 3 (27.3)          |
| Fatigue                               | 2 (14.3)           | 4 (28.6)           | 6 (21.4)          | 0                 | 2 (33.3)          | 2 (18.2)          |
| Hypertension                          | 3 (21.4)           | 4 (28.6)           | 7 (25.0)          | 0                 | 1 (16.7)          | 1 (9.1)           |
| Nausea                                | 2 (14.3)           | 4 (28.6)           | 6 (21.4)          | 0                 | 2 (33.3)          | 2 (18.2)          |
| Diarrhea                              | 2 (14.3)           | 2 (14.3)           | 4 (14.3)          | 1 (20.0)          | 2 (33.3)          | 3 (27.3)          |
| Somnolence                            | 4 (28.6)           | 2 (14.3)           | 6 (21.4)          | 0                 | 0                 | 0                 |
| Thrombocytosis                        | 1 (7.1)            | 1 (7.1)            | 2 (7.1)           | 1 (20.0)          | 3 (50.0)          | 4 (36.4)          |
| Vomiting                              | 1 (7.1)            | 3 (21.4)           | 4 (14.3)          | 0                 | 2 (33.3)          | 2 (18.2)          |
| Pruritus                              | 2 (14.3)           | 3 (21.4)           | 5 (17.9)          | 0                 | 0                 | 0                 |
| Pain in extremity                     | 1 (7.1)            | 2 (14.3)           | 3 (10.7)          | 1 (20.0)          | 0                 | 1 (9.1)           |
| Dyspnea                               | 2 (14.3)           | 1 (7.1)            | 3 (10.7)          | 0                 | 1 (16.7)          | 1 (9.1)           |
| Asthenia                              | 1 (7.1)            | 2 (14.3)           | 3 (10.7)          | 0                 | 0                 | 0                 |
| Constipation                          | 2 (14.3)           | 1 (7.1)            | 3 (10.7)          | 0                 | 0                 | 0                 |

Data reported as n (%)

<sup>a</sup>Reported by  $\geq 3$  patients in any dose group.

TEAE, treatment-emergent adverse event.
